# Supplementary material for: Time-resolved gas-phase kinetic studies of the reaction of dimethylsilylene with triethylsilane-1-d: kinetic isotope effect for the Si–H insertion process
Source: Royal Society of Chemistry journal article supplement (doi:10.1039/c3cp43222j), 2013-01-01
Supplement: c3cp43222j.pdf [file c3cp43222j.pdf]

## Supplementary Information

### Time-resolved gas-phase kinetic studies of the reaction of dimethylsilylene with triethylsilane-1-d: kinetic isotope effect for the Si-H insertion process.

Rosa Becerra, J. Pat Cannady and Robin Walsh

#### Corrections to Gaussian output<sup>1</sup> for entropy

(a) *General*

1. Vibration wavenumber corrections made using formula<sup>2</sup>:

$$S_{\text{vib}} = R[u/(e^u - 1) - \ln(1 - e^{-u})] \quad \text{where } u = 1.4387(\omega/\text{cm}^{-1})/(T/\text{K})$$

2. Conversion of twisting vibrations into hindered internal rotations:

$S_{\text{int rot}}$  obtained from Table 27-12 (ref 2, p.445) using values of partition function  $Q_f$  and internal rotation barrier  $V$ .  $Q_f$  is calculated from reduced internal rotation moment of inertia,  $I_f$ , using:

$$Q_f = 0.360(I_f/\text{u}\text{\AA}^2)^{1/2}(T/\text{K})^{1/2}/\sigma$$

$I_f$  is calculated from the Gaussian structure geometry for the molecular species.

(b) *Specifics for molecular species<sup>3</sup>*

1. Me<sub>3</sub>SiH

Three Me-group twisting modes with adjusted wavenos,  $\omega/\text{cm}^{-1}(\text{G3}) = 132, 147(2); \omega/\text{cm}^{-1}(\text{G3B3}) = 139, 150, 160$ .

Three Me-group internal rotations with barriers,  $1.84 \text{ kcal mol}^{-1}$ ,  $\sigma = 3$  and  $I_f = 3.0 \text{ u}\text{\AA}^2$ ,  $Q_f(298\text{K}) = 3.6$ ,  $V/RT = 3.1$ .

| Entropy values (cal K <sup>-1</sup> mol <sup>-1</sup> ) | G3     | G3B3   |
|---------------------------------------------------------|--------|--------|
| Gaussian entropy, Total                                 | 80.40  | 81.40  |
| Vib                                                     | -15.84 | -16.83 |
| Waveno. Corrected Vib                                   | +18.08 | +17.62 |
| Sub-total                                               | 82.62  | 82.19  |
| Twisting mode contrib.                                  | -8.33  | -8.03  |
| Internal Rotation contrib.                              | +8.31  | +8.31  |
| Symmetry contrib.                                       | -2.18  | -2.18  |
| Corrected Total                                         | 80.42  | 80.29  |

## 2. SiMe<sub>2</sub>

Two Me-group twisting modes with adjusted wavenos,  $\omega/\text{cm}^{-1}(\text{G3}) = 46, 98$ ;  
 $\omega/\text{cm}^{-1}(\text{G3B3}) = 92, 98$ .

Two Me-group internal rotations with barriers,  $1.84 \text{ kJ mol}^{-1 4,5}$ ,  $\sigma = 3$  and  $I_f = 3.0$   
 $\text{u}\text{\AA}^2$ ,  $Q_f(298\text{K}) = 3.6$ ,  $V/RT = 3.1$ .

| <u>Entropy values (cal K<sup>-1</sup> mol<sup>-1</sup>)</u> | <u>G3</u> | <u>G3B3</u> |
|-------------------------------------------------------------|-----------|-------------|
| Gaussian entropy, Total                                     | 73.28     | 72.92       |
| Vib                                                         | -11.40    | -11.01      |
| Waveno. Corrected Vib                                       | +12.68    | +11.49      |
| Sub-total                                                   | 74.56     | 73.40       |
| Twisting mode contrib.                                      | -8.45     | -7.11       |
| Internal Rotation contrib.                                  | +6.54     | +6.54       |
| Symmetry contrib.                                           | -1.38     | -1.38       |
| Corrected Total                                             | 70.27     | 70.45       |

## 3. TS2

Five Me-group twisting modes with adjusted wavenos,  $\omega/\text{cm}^{-1}(\text{G3}) = 129, 135(2),$   
 $146, 151$ ;  $\omega/\text{cm}^{-1}(\text{G3B3}) = 123, 132, 133, 139, 145$ .

Five Me-group internal rotations with barriers,  $1.84 \text{ kcal mol}^{-1 4,5}$ ,  $\sigma = 3$  and  $I_f =$   
 $3.0 \text{ u}\text{\AA}^2$ ,  $Q_f(298\text{K}) = 3.6$ ,  $V/RT = 3.1$ .

| <u>Entropy values (cal K<sup>-1</sup> mol<sup>-1</sup>)</u> | <u>G3</u> | <u>G3B3</u> |
|-------------------------------------------------------------|-----------|-------------|
| Gaussian entropy, Total                                     | 109.03    | 111.88      |
| Vib                                                         | -38.97    | -41.81      |
| Waveno. Corrected Vib                                       | +43.41    | +43.42      |
| Sub-total                                                   | 113.47    | 113.49      |
| Twisting mode contrib.                                      | -14.11    | -14.44      |
| Internal Rotation contrib.                                  | +13.85    | +13.85      |
| Symmetry contrib.                                           | 0         | 0           |
| Corrected Total                                             | 113.21    | 112.90      |

#### 4. Me<sub>3</sub>SiSiMe<sub>2</sub>H

Five Me-group twisting modes with adjusted wavenos,  $\omega/\text{cm}^{-1}(\text{G3}) = 142, 146, 148, 155, 156$ ;  $\omega/\text{cm}^{-1}(\text{G3B3}) = 151, 153, 154, 160, 161$ .

One Si–Si twisting mode with adjusted waveno,  $\omega/\text{cm}^{-1}(\text{G3}) = 23$ ;  $\omega/\text{cm}^{-1}(\text{G3B3}) = 26$ .

Five Me-group internal rotations with barriers,  $1.84 \text{ kcal mol}^{-1}$ <sup>4,5</sup>,  $\sigma = 3$  and  $I_f = 3.0 \text{ u}\text{\AA}^2$ ,  $Q_f(298\text{K}) = 3.6$ ,  $V/RT = 3.1$ .

One Si–Si internal rotation with barrier,  $1.10 \text{ kcal mol}^{-1}$ <sup>6,7</sup>,  $\sigma = 3$  and  $I_f = 3.0 \text{ u}\text{\AA}^2$ ,  $Q_f(298\text{K}) = 15.7$ ,  $V/RT = 1.8$ .

| <u>Entropy values (cal K<sup>-1</sup> mol<sup>-1</sup>)</u> | <u>G3</u> | <u>G3B3</u> |
|-------------------------------------------------------------|-----------|-------------|
| Gaussian entropy, Total                                     | 111.70    | 113.92      |
| Vib                                                         | -41.76    | -43.96      |
| Waveno. Corrected Vib                                       | +46.42    | +45.65      |
| Sub-total                                                   | 116.37    | 115.61      |
| Twisting mode contrib.                                      | -19.78    | -19.12      |
| Internal Rotation contrib.                                  | +19.92    | +19.92      |
| Symmetry contrib.                                           | 0         | 0           |
| Corrected Total                                             | 116.51    | 116.41      |

#### References

1. M. J. Frisch et al, *Gaussian 03*, revision E.01, Gaussian, Inc., Wallingford CT, 2004.  
[For full reference see main paper, ref. 27.]
2. K. S. Pitzer and L. Brewer, *Thermodynamics*, 2<sup>nd</sup> Edn., McGraw-Hill, New York, 1961.
3. Energy units: calories; 1 cal = 4.184 J.
4. L. Pierce and D. H. Petersen, *J. Chem. Phys.*, 1960, **33**, 907.
5. Me group internal rotation barriers in species other than Me<sub>3</sub>SiH are not known. We have assumed the same value as in Me<sub>3</sub>SiH.
6. This barrier is not known. We have assumed the same value as for Si<sub>2</sub>H<sub>6</sub><sup>7</sup>.
7. J. R. Durig and J. S. Church, *J. Chem. Phys.*, 1980, **73**, 4784.
